# Supplementary material
Source: PubMed Central journal article supplement (PMC3592753)
Supplement: june-11-27-s001.pdf [file june-11-27-s001.pdf]

## FUN Core UG Neuroscience Competencies

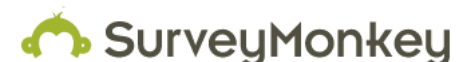

1. Please Rank, from 1 (Highest) to 6 (Lowest) the following core competencies as they pertain to undergraduate neuroscience education. While it may be that you regard all of these competencies as essential, your feedback will help determine how well they are aligned with the expectations of graduate programs in the neurosciences and national curricular initiatives in STEM education. There will be an opportunity to identify other core competencies elsewhere in the survey.

|                                                              | 1 Most Essential  | 2                 | 3          | 4          | 5                 | 6 Least Essential | Rating Average | Response Count |
|--------------------------------------------------------------|-------------------|-------------------|------------|------------|-------------------|-------------------|----------------|----------------|
| Basic knowledge in Neuroscience/Biology/Chemistry/Psychology | <b>32.0% (65)</b> | 19.2% (39)        | 13.8% (28) | 14.8% (30) | 8.4% (17)         | 11.8% (24)        | 2.84           | 203            |
| Quantitative skills                                          | 0.5% (1)          | 4.9% (10)         | 10.3% (21) | 23.2% (47) | 29.6% (60)        | <b>31.5% (64)</b> | 4.71           | 203            |
| Ability to think critically and integratively                | <b>37.9% (77)</b> | 25.6% (52)        | 20.2% (41) | 10.8% (22) | 3.9% (8)          | 1.5% (3)          | 2.22           | 203            |
| Scientific inquiry/analytic skills/research skills           | 17.2% (35)        | <b>31.0% (63)</b> | 28.6% (58) | 12.8% (26) | 7.4% (15)         | 3.0% (6)          | 2.71           | 203            |
| Communication skills                                         | 3.4% (7)          | 5.9% (12)         | 7.9% (16)  | 23.6% (48) | 28.6% (58)        | <b>30.5% (62)</b> | 4.60           | 203            |
| Independent thinkers, self-motivated learners                | 8.9% (18)         | 13.3% (27)        | 19.2% (39) | 14.8% (30) | <b>22.2% (45)</b> | 21.7% (44)        | 3.93           | 203            |
| <b>answered question</b>                                     |                   |                   |            |            |                   |                   |                | <b>203</b>     |
| <b>skipped question</b>                                      |                   |                   |            |            |                   |                   |                | <b>0</b>       |

**2. Please rate the fundamental importance of the following components of a core competency in basic knowledge in neuroscience.**

|                                                                                                  | Essential          |                   | Moderately Important |           | Nonessential                   | Rating Average | Response Count |
|--------------------------------------------------------------------------------------------------|--------------------|-------------------|----------------------|-----------|--------------------------------|----------------|----------------|
| Understanding the cellular and molecular function of neurons, including how neurons communicate. | <b>77.0% (151)</b> | 19.4% (38)        | 3.6% (7)             | 0.0% (0)  | 0.0% (0)                       | 1.27           | 196            |
| Understanding development and plasticity of the nervous system.                                  | 21.4% (42)         | <b>44.4% (87)</b> | 28.6% (56)           | 4.1% (8)  | 1.5% (3)                       | 2.20           | 196            |
| Understanding of basic neuroanatomy.                                                             | <b>44.4% (87)</b>  | 27.0% (53)        | 23.0% (45)           | 5.1% (10) | 0.5% (1)                       | 1.90           | 196            |
| Understanding of behavior and cognition, as they relate to neuroscience.                         | 34.7% (68)         | <b>41.8% (82)</b> | 18.9% (37)           | 3.6% (7)  | 1.0% (2)                       | 1.94           | 196            |
| Understanding of sensory and motor systems, as they relate to neuroscience.                      | 24.0% (47)         | <b>46.4% (91)</b> | 23.5% (46)           | 3.6% (7)  | 2.6% (5)                       | 2.14           | 196            |
|                                                                                                  |                    |                   |                      |           | Other (please specify & rate ) |                | 16             |
|                                                                                                  |                    |                   |                      |           | <b>answered question</b>       |                | <b>196</b>     |
|                                                                                                  |                    |                   |                      |           | <b>skipped question</b>        |                | <b>7</b>       |

### 3. Please rate the fundamental importance of the following components of a core competency in quantitative skills.

|                                                                                            | Essential          |                   | Moderately important |          | Nonessential             | Rating Average | Response Count |
|--------------------------------------------------------------------------------------------|--------------------|-------------------|----------------------|----------|--------------------------|----------------|----------------|
| Ability to quantitatively manipulate data and information                                  | 36.7% (72)         | <b>42.9% (84)</b> | 18.4% (36)           | 2.0% (4) | 0.0% (0)                 | 1.86           | 196            |
| Ability to analyze and interpret quantitative information, including graphs and statistics | <b>76.0% (149)</b> | 18.9% (37)        | 5.1% (10)            | 0.0% (0) | 0.0% (0)                 | 1.29           | 196            |
| Ability to represent information in a quantitative format.                                 | 34.7% (68)         | <b>45.4% (89)</b> | 18.9% (37)           | 1.0% (2) | 0.0% (0)                 | 1.86           | 196            |
|                                                                                            |                    |                   |                      |          | Other (please specify)   |                | 6              |
|                                                                                            |                    |                   |                      |          | <b>answered question</b> |                | <b>196</b>     |
|                                                                                            |                    |                   |                      |          | <b>skipped question</b>  |                | <b>7</b>       |

**4. Please rate the fundamental importance of the following components of a core competency in critical and integrative thinking.**

|                                                                                                                    | <b>Most Essential</b> |                   | <b>Moderately Important</b> |          | <b>Nonessential</b>    | <b>Rating Average</b> | <b>Response Count</b>    |            |
|--------------------------------------------------------------------------------------------------------------------|-----------------------|-------------------|-----------------------------|----------|------------------------|-----------------------|--------------------------|------------|
| Ability to read and analyze a primary research paper                                                               | <b>62.7% (121)</b>    | 32.1% (62)        | 5.2% (10)                   | 0.0% (0) | 0.0% (0)               | 1.42                  | 193                      |            |
| Ability to critique and develop experimental designs and methodology                                               | <b>43.0% (83)</b>     | 42.0% (81)        | 13.5% (26)                  | 1.6% (3) | 0.0% (0)               | 1.74                  | 193                      |            |
| Ability to integrate findings from diverse fields to address a research question or develop a testable hypothesis. | 35.8% (69)            | <b>45.1% (87)</b> | 15.0% (29)                  | 3.6% (7) | 0.5% (1)               | 1.88                  | 193                      |            |
|                                                                                                                    |                       |                   |                             |          | Other (please specify) |                       | 4                        |            |
|                                                                                                                    |                       |                   |                             |          |                        |                       | <b>answered question</b> | <b>193</b> |
|                                                                                                                    |                       |                   |                             |          |                        |                       | <b>skipped question</b>  | <b>10</b>  |

**5. Please rate the fundamental importance of the following components of a core competency regarding research skills.**

|                                                                                                                                                                                                                               | Most Essential     |            | Moderately Important |            | Nonessential           | Rating Average | Response Count |
|-------------------------------------------------------------------------------------------------------------------------------------------------------------------------------------------------------------------------------|--------------------|------------|----------------------|------------|------------------------|----------------|----------------|
| Ability to perform multiple techniques related to neuroscience research (specific techniques may vary, but include: anatomical techniques, electrophysiology, biochemical techniques, cell culture, behavioral studies, etc.) | 7.8% (15)          | 31.6% (61) | <b>45.1% (87)</b>    | 11.9% (23) | 3.6% (7)               | 2.72           | 193            |
| Ability to develop a hypothesis and design experiments to test this hypothesis.                                                                                                                                               | <b>72.5% (140)</b> | 21.8% (42) | 4.7% (9)             | 1.0% (2)   | 0.0% (0)               | 1.34           | 193            |
| Ability to collect , analyze, and interpret data.                                                                                                                                                                             | <b>50.8% (98)</b>  | 40.4% (78) | 7.3% (14)            | 1.6% (3)   | 0.0% (0)               | 1.60           | 193            |
|                                                                                                                                                                                                                               |                    |            |                      |            | Other (please specify) |                | 5              |
| <b>answered question</b>                                                                                                                                                                                                      |                    |            |                      |            |                        |                | <b>193</b>     |
| <b>skipped question</b>                                                                                                                                                                                                       |                    |            |                      |            |                        |                | <b>10</b>      |

**6. Please rate the fundamental importance of the following components of a core competency in communication skills.**

|                                                                                                  | <b>Most Essential</b> |                   | <b>Moderately Important</b> |           | <b>Nonessential</b>    | <b>Rating Average</b> | <b>Response Count</b> |
|--------------------------------------------------------------------------------------------------|-----------------------|-------------------|-----------------------------|-----------|------------------------|-----------------------|-----------------------|
| Ability to present information orally in an organized and understandable manner.                 | <b>49.7% (96)</b>     | 39.4% (76)        | 10.4% (20)                  | 0.5% (1)  | 0.0% (0)               | 1.62                  | 193                   |
| Ability to communicate scientific information in written format for scientific publication.      | 40.4% (78)            | <b>42.0% (81)</b> | 15.0% (29)                  | 2.6% (5)  | 0.0% (0)               | 1.80                  | 193                   |
| Ability to communicate scientific information to the lay public in both oral and written format. | 25.4% (49)            | <b>36.3% (70)</b> | 31.1% (60)                  | 6.7% (13) | 0.5% (1)               | 2.21                  | 193                   |
|                                                                                                  |                       |                   |                             |           | Other (please specify) |                       | 3                     |
| <b>answered question</b>                                                                         |                       |                   |                             |           |                        |                       | <b>193</b>            |
| <b>skipped question</b>                                                                          |                       |                   |                             |           |                        |                       | <b>10</b>             |

**7. Please rate the fundamental importance of the following components of a core competency in independent thinking/self-motivated learning.**

|                                                                                                                         | Most Essential    |                   | Moderately Important |           | Nonessential           | Rating Average | Response Count           |            |
|-------------------------------------------------------------------------------------------------------------------------|-------------------|-------------------|----------------------|-----------|------------------------|----------------|--------------------------|------------|
| Ability to find answers to questions that may not be specifically addressed in a course                                 | <b>49.7% (96)</b> | 37.8% (73)        | 11.9% (23)           | 0.5% (1)  | 0.0% (0)               | 1.63           | 193                      |            |
| Ability to overcome barriers/impediments to learning/research.                                                          | 23.8% (46)        | <b>47.7% (92)</b> | 23.3% (45)           | 5.2% (10) | 0.0% (0)               | 2.10           | 193                      |            |
| Ability to defend unique views/approaches/answers to well established phenomenon/theories based upon objective evidence | 32.1% (62)        | <b>38.9% (75)</b> | 24.4% (47)           | 4.1% (8)  | 0.5% (1)               | 2.02           | 193                      |            |
|                                                                                                                         |                   |                   |                      |           | Other (please specify) |                | 2                        |            |
|                                                                                                                         |                   |                   |                      |           |                        |                | <b>answered question</b> | <b>193</b> |
|                                                                                                                         |                   |                   |                      |           |                        |                | <b>skipped question</b>  | <b>10</b>  |

**8. Please identify your Institution (this will help account for instances when their have been multiple respondents from the same institution).**

|                          | <b>Response<br/>Count</b> |
|--------------------------|---------------------------|
|                          | 166                       |
| <b>answered question</b> | <b>166</b>                |
| <b>skipped question</b>  | <b>37</b>                 |



**9. Please select from the following options those attributes that best describes the undergraduate neuroscience program at your institutions.**

**Type of Undergraduate Program**

|                   | <b>Major</b>      | <b>Minor</b> | <b>Concentration</b> | <b>Other</b>      | <b>Response Count</b> |
|-------------------|-------------------|--------------|----------------------|-------------------|-----------------------|
| University        | <b>47.5% (38)</b> | 7.5% (6)     | 10.0% (8)            | 35.0% (28)        | 80                    |
| 4yr College       | <b>46.7% (42)</b> | 8.9% (8)     | 23.3% (21)           | 21.1% (19)        | 90                    |
| Community College | 0.0% (0)          | 0.0% (0)     | 0.0% (0)             | <b>100.0% (3)</b> | 3                     |

**Avg Number of Annual Graduates from the Program**

|                   | <b>&lt; 5</b>     | <b>6 &lt; 10</b>  | <b>11 &gt; 15</b> | <b>&gt; 15</b> | <b>Response Count</b> |
|-------------------|-------------------|-------------------|-------------------|----------------|-----------------------|
| University        | <b>41.8% (33)</b> | 13.9% (11)        | 6.3% (5)          | 38.0% (30)     | 79                    |
| 4yr College       | <b>26.7% (24)</b> | <b>26.7% (24)</b> | 21.1% (19)        | 25.6% (23)     | 90                    |
| Community College | <b>100.0% (2)</b> | 0.0% (0)          | 0.0% (0)          | 0.0% (0)       | 2                     |

Other - If none of the choices above accurately describe your program, please do so below: 60

|                          |            |
|--------------------------|------------|
| <b>answered question</b> | <b>166</b> |
| <b>skipped question</b>  | <b>37</b>  |

**10. Please indicate below the number of faculty in each departments that are active participants in your program (i.e., they are instructor of record for a course in the program).**

**Fulltime Faculty**

|                                | 0                            | 1             | 2                           | 3             | 4            | 5            | 6        | 7        | 8        | 9        | 10   |
|--------------------------------|------------------------------|---------------|-----------------------------|---------------|--------------|--------------|----------|----------|----------|----------|------|
| Neuroscience                   | <b>61.9%</b><br><b>(96)</b>  | 9.7%<br>(15)  | 3.9% (6)                    | 5.8% (9)      | 3.9% (6)     | 2.6% (4)     | 0.6% (1) | 1.9% (3) | 1.3% (2) | 0.0% (0) | 1.3% |
| Biology                        | 14.8%<br>(24)                | 19.8%<br>(32) | <b>23.5%</b><br><b>(38)</b> | 13.6%<br>(22) | 7.4%<br>(12) | 6.2%<br>(10) | 4.9% (8) | 1.2% (2) | 2.5% (4) | 1.2% (2) | 1.2% |
| Psychology                     | 11.0%<br>(18)                | 18.4%<br>(30) | <b>23.9%</b><br><b>(39)</b> | 16.0%<br>(26) | 9.2%<br>(15) | 7.4%<br>(12) | 4.3% (7) | 0.6% (1) | 0.0% (0) | 1.8% (3) | 1.8% |
| Chemistry                      | <b>57.1%</b><br><b>(89)</b>  | 17.3%<br>(27) | 11.5%<br>(18)               | 2.6% (4)      | 3.8% (6)     | 3.2% (5)     | 0.6% (1) | 0.0% (0) | 1.3% (2) | 0.0% (0) | 1.3% |
| Biochemistry                   | <b>75.0%</b><br><b>(111)</b> | 12.8%<br>(19) | 5.4% (8)                    | 0.0% (0)      | 2.7% (4)     | 1.4% (2)     | 0.0% (0) | 0.7% (1) | 0.7% (1) | 0.0% (0) | 0.0% |
| Computer Science & Mathematics | <b>73.0%</b><br><b>(111)</b> | 11.2%<br>(17) | 5.3% (8)                    | 2.6% (4)      | 2.0% (3)     | 2.0% (3)     | 1.3% (2) | 0.7% (1) | 0.7% (1) | 0.0% (0) | 0.7% |
| Philosophy                     | <b>69.3%</b><br><b>(106)</b> | 14.4%<br>(22) | 6.5%<br>(10)                | 5.2% (8)      | 2.0% (3)     | 0.7% (1)     | 1.3% (2) | 0.0% (0) | 0.0% (0) | 0.0% (0) | 0.0% |
| Other                          | <b>71.3%</b><br><b>(102)</b> | 15.4%<br>(22) | 4.9% (7)                    | 1.4% (2)      | 0.7% (1)     | 1.4% (2)     | 2.8% (4) | 0.0% (0) | 0.0% (0) | 0.0% (0) | 0.0% |

**Fulltime Adjunct Faculty**

|  | 0 | 1 | 2 | 3 | 4 | 5 | 6 | 7 | 8 | 9 | 10 |
|--|---|---|---|---|---|---|---|---|---|---|----|
|--|---|---|---|---|---|---|---|---|---|---|----|

|                                |                              |          |          |          |          |          |          |          |          |          |      |
|--------------------------------|------------------------------|----------|----------|----------|----------|----------|----------|----------|----------|----------|------|
| Neuroscience                   | <b>93.5%</b><br><b>(145)</b> | 1.3% (2) | 1.3% (2) | 0.0% (0) | 1.9% (3) | 0.0% (0) | 0.0% (0) | 0.6% (1) | 0.6% (1) | 0.0% (0) | 0.0% |
| Biology                        | <b>89.0%</b><br><b>(138)</b> | 4.5% (7) | 2.6% (4) | 0.6% (1) | 0.6% (1) | 0.6% (1) | 0.0% (0) | 0.0% (0) | 0.6% (1) | 0.0% (0) | 0.6% |
| Psychology                     | <b>90.3%</b><br><b>(139)</b> | 5.2% (8) | 1.3% (2) | 0.6% (1) | 0.0% (0) | 0.6% (1) | 0.0% (0) | 0.0% (0) | 0.6% (1) | 0.0% (0) | 0.6% |
| Chemistry                      | <b>95.2%</b><br><b>(140)</b> | 0.7% (1) | 0.7% (1) | 1.4% (2) | 0.7% (1) | 0.0% (0) | 0.0% (0) | 0.0% (0) | 0.7% (1) | 0.0% (0) | 0.7% |
| Biochemistry                   | <b>97.2%</b><br><b>(141)</b> | 0.0% (0) | 0.7% (1) | 0.0% (0) | 0.0% (0) | 0.7% (1) | 0.0% (0) | 0.0% (0) | 0.7% (1) | 0.7% (1) | 0.0% |
| Computer Science & Mathematics | <b>95.2%</b><br><b>(138)</b> | 1.4% (2) | 0.0% (0) | 0.0% (0) | 1.4% (2) | 0.7% (1) | 0.0% (0) | 0.0% (0) | 0.7% (1) | 0.0% (0) | 0.7% |
| Philosophy                     | <b>96.6%</b><br><b>(140)</b> | 0.7% (1) | 0.7% (1) | 0.7% (1) | 0.0% (0) | 0.7% (1) | 0.0% (0) | 0.0% (0) | 0.7% (1) | 0.0% (0) | 0.0% |
| Other                          | <b>96.4%</b><br><b>(135)</b> | 1.4% (2) | 0.7% (1) | 0.0% (0) | 0.0% (0) | 0.7% (1) | 0.0% (0) | 0.0% (0) | 0.0% (0) | 0.0% (0) | 0.7% |

**Part-time Faculty/Staff**

|              | <b>0</b>                     | <b>1</b>     | <b>2</b> | <b>3</b> | <b>4</b> | <b>5</b> | <b>6</b> | <b>7</b> | <b>8</b> | <b>9</b> | <b>10</b> |
|--------------|------------------------------|--------------|----------|----------|----------|----------|----------|----------|----------|----------|-----------|
| Neuroscience | <b>87.7%</b><br><b>(135)</b> | 5.2% (8)     | 3.9% (6) | 0.6% (1) | 0.6% (1) | 0.0% (0) | 0.0% (0) | 0.0% (0) | 0.0% (0) | 0.0% (0) | 0.6%      |
| Biology      | <b>86.8%</b><br><b>(132)</b> | 5.9% (9)     | 3.3% (5) | 1.3% (2) | 0.7% (1) | 0.0% (0) | 0.0% (0) | 0.0% (0) | 0.0% (0) | 0.0% (0) | 0.0%      |
| Psychology   | <b>88.7%</b><br><b>(134)</b> | 6.6%<br>(10) | 2.0% (3) | 0.7% (1) | 0.7% (1) | 0.0% (0) | 0.0% (0) | 0.0% (0) | 0.0% (0) | 0.0% (0) | 0.0%      |

|                                |                        |          |          |          |          |          |          |          |          |          |      |
|--------------------------------|------------------------|----------|----------|----------|----------|----------|----------|----------|----------|----------|------|
| Chemistry                      | <b>91.9%<br/>(136)</b> | 2.0% (3) | 0.7% (1) | 1.4% (2) | 2.0% (3) | 0.0% (0) | 0.0% (0) | 0.0% (0) | 0.0% (0) | 0.0% (0) | 0.0% |
| Biochemistry                   | <b>95.8%<br/>(138)</b> | 0.7% (1) | 0.7% (1) | 0.0% (0) | 0.7% (1) | 0.7% (1) | 0.0% (0) | 0.0% (0) | 0.0% (0) | 0.7% (1) | 0.0% |
| Computer Science & Mathematics | <b>94.5%<br/>(137)</b> | 2.1% (3) | 0.7% (1) | 1.4% (2) | 0.7% (1) | 0.0% (0) | 0.0% (0) | 0.0% (0) | 0.0% (0) | 0.0% (0) | 0.0% |
| Philosophy                     | <b>97.2%<br/>(140)</b> | 0.0% (0) | 1.4% (2) | 0.0% (0) | 1.4% (2) | 0.0% (0) | 0.0% (0) | 0.0% (0) | 0.0% (0) | 0.0% (0) | 0.0% |
| Other                          | <b>97.1%<br/>(135)</b> | 1.4% (2) | 0.0% (0) | 0.7% (1) | 0.0% (0) | 0.0% (0) | 0.0% (0) | 0.0% (0) | 0.0% (0) | 0.0% (0) | 0.0% |

If you selected Other - please indicate the departments.

|  |    |
|--|----|
|  | an |
|  | s  |

### 11. Does your institution offer a graduate degree in neuroscience ?

|     | Yes        | No                       | Response Count |
|-----|------------|--------------------------|----------------|
| MS  | 13.3% (22) | <b>86.7% (144)</b>       | 166            |
| PhD | 24.1% (40) | <b>75.9% (126)</b>       | 166            |
|     |            | <b>answered question</b> | <b>166</b>     |
|     |            | <b>skipped question</b>  | <b>37</b>      |

**12. Please indicate which of the Core Competencies are used in your program for the purposes of curricular development and student or program assessment.**

|                                                                | <b>Curricular Development</b> | <b>Student Assessment</b> | <b>Program Assessment</b> | <b>NA</b>                | <b>Response Count</b> |
|----------------------------------------------------------------|-------------------------------|---------------------------|---------------------------|--------------------------|-----------------------|
| - Basic knowledge in Neuroscience/Biology/Chemistry/Psychology | <b>74.3% (113)</b>            | 68.4% (104)               | 40.1% (61)                | 11.8% (18)               | 152                   |
| - Quantitative Skills                                          | 57.2% (83)                    | <b>64.1% (93)</b>         | 28.3% (41)                | 17.2% (25)               | 145                   |
| - Critical and Integrative Thinking                            | 54.3% (82)                    | <b>66.9% (101)</b>        | 38.4% (58)                | 17.9% (27)               | 151                   |
| - Research Skills                                              | 57.4% (85)                    | <b>63.5% (94)</b>         | 39.2% (58)                | 18.9% (28)               | 148                   |
| - Communication Skills                                         | 49.3% (74)                    | <b>72.7% (109)</b>        | 38.0% (57)                | 14.0% (21)               | 150                   |
| - Independent Thinkers/Self-motivated Learners                 | 34.5% (48)                    | <b>45.3% (63)</b>         | 19.4% (27)                | 37.4% (52)               | 139                   |
|                                                                |                               |                           |                           | <b>answered question</b> | <b>153</b>            |
|                                                                |                               |                           |                           | <b>skipped question</b>  | <b>50</b>             |
